# Supplementary material for: Anti-glycoprotein antibodies and sequestration pattern of indium-labeled platelets in immune thrombocytopenia
Source: PubMed Central journal article supplement — Blood Adv. 2022 Mar 16;6(6):1797–803. doi: 10.1182/bloodadvances.2021004822 (PMC8941471; doi:10.1182/bloodadvances.2021004822), 2022-03-16
Supplement: advancesADV2021004822-suppl1.pdf [file advancesADV2021004822-suppl1.pdf]

## Supplementary materials

**Table SI – Distribution of antibody specificities & combinations of antibodies using direct MAIPA**

| Anti-GP antibodies             | n (%)     |
|--------------------------------|-----------|
| IIbIIIa only                   | 9 (16%)   |
| IbIX only                      | 1 (2%)    |
| V only                         | 5 (9%)    |
| IIbIIIa & V combination        | 2 (4%)    |
| IbIX & V combination           | 3 (5%)    |
| IIbIIIa & IbIX combination     | 1 (2%)    |
| IIbIIIa & IbIX & V combination | 9 (16%)   |
| Antibody positive              | 30 (54%)  |
| Antibody negative              | 27 (47%)  |
| Total                          | 57 (100%) |

**Table SII – Linear regression for the association between sequestration pattern and clearance rate**

|                                                  | Platelet clearance rate                    |                                                 |                                                |
|--------------------------------------------------|--------------------------------------------|-------------------------------------------------|------------------------------------------------|
|                                                  | Overall<br>$\beta$ (SE),<br><i>p</i> value | Anti-GP pos*<br>$\beta$ (SE),<br><i>p</i> value | Anti-GP neg<br>$\beta$ (SE),<br><i>p</i> value |
| Splenic sequestration (%)<br>pattern at 48 hours | 0.046 (0.029)<br>p=0.119                   | 0.186* (0.066)<br>p=0.009                       | -0.052 (0.118)<br>p=0.664                      |
| Splenic sequestration (%)<br>pattern at 24 hours | 0.038 (0.025)<br>p=0.133                   | 0.196* (0.069)<br>p=0.008                       | -0.037 (0.123)<br>p=0.765                      |
| Splenic sequestration (%)<br>pattern at 30 min   | 0.016 (0.014)<br>p=0.273                   | 0.264* (0.084)<br>p=0.004                       | -0.037 (0.146)<br>p=0.804                      |

\*Antibodies were considered positive when the direct MAIPA was 0.130 or higher.
